# Supplementary material for: DNA Polymerase Epsilon Deficiency Causes IMAGe Syndrome with Variable Immunodeficiency
Source: PubMed Central journal article supplement — Am J Hum Genet. 2018 Nov 29;103(6):1038–44. doi: 10.1016/j.ajhg.2018.10.024 (PMC6288413; doi:10.1016/j.ajhg.2018.10.024), 2018-11-29
Supplement: mmc1.pdf [file mmc1.pdf]

## Supplemental Data

### DNA Polymerase Epsilon Deficiency Causes

### IMAGe Syndrome with Variable Immunodeficiency

Clare V. Logan, Jennie E. Murray, David A. Parry, Andrea Robertson, Roberto Bellelli, Žygimantė Tarnauskaitė, Rachel Challis, Louise Cleal, Valerie Borel, Adeline Fluteau, Javier Santoyo-Lopez, SGP Consortium, Tim Aitman, Inês Barroso, Donald Basel, Louise S. Bicknell, Himanshu Goel, Hao Hu, Chad Huff, Michele Hutchison, Caroline Joyce, Rachel Knox, Amy E. Lacroix, Sylvie Langlois, Shawn McCandless, Julie McCarrier, Kay A. Metcalfe, Rose Morrissey, Nuala Murphy, Irène Netchine, Susan M. O'Connell, Ann Haskins Olney, Nandina Paria, Jill A. Rosenfeld, Mark Sherlock, Erin Syverson, Perrin C. White, Carol Wise, Yao Yu, Margaret Zacharin, Indraneel Banerjee, Martin Reijns, Michael B. Bober, Robert K. Semple, Simon J. Boulton, Jonathan J. Rios, and Andrew P. Jackson

## Supplemental Note: Case Reports

**Skeletal Features:** Metaphyseal dysplasia was a defining feature of the original IMAGE association<sup>1</sup>. In these initial case reports, the metaphyses were reported to be striated and irregular. Osteopenia, delayed bone age and small epiphyses were also noted. With the identification of *CDKN1C* mutations as a cause of IMAGE syndrome, it became evident that metaphyseal changes and the other skeletal findings were variably present and could be expanded to include scoliosis<sup>2</sup>. The identified skeletal abnormalities are age-dependent, can be absent or subtle<sup>3</sup> and most commonly manifest as delayed bone age and short stature<sup>3</sup>. Similar skeletal involvement is seen in *POLE* deficient IMAGE subjects, with generalised undermineralisation (osteopenia) and bilateral hip dysplasia being the most commonly reported (n=8). Metaphyseal widening and striations were previously reported in P13<sup>4</sup> and P12<sup>5</sup>. P1 and P6 also have metaphyseal involvement characterized by a sclerotic metaphyseal band and mild widening. Scoliosis (n=3), increased epiphyseal density in distal phalanges (n=1), 11 rib pairs (n=2), absent/hypoplastic patella (n=2), brachydactyly (n=1) were reported in other cases. P4 had no clear metaphyseal abnormalities (though growth plates were closed in this adult patient, age 50), however osteopenia and an increased upper thoracic kyphosis were present. Metaphyseal striations were also reported with the previously reported c.4444+3A>G mutation (which was denoted, 'FILS syndrome', mild facial dysmorphism, immunodeficiency, livedo, and short stature)<sup>6</sup>.

**Habitus:** In the three adult subjects (P1, 4, 10), central adiposity and thin extremities were noted.

**Neurocognition:** Developmental delay/learning disability varied from normal or mild speech delay to moderate-severe impairment. Three individuals developed seizures with at least two occurring in childhood. MRI neuroimaging, normal (n=3), pituitary hypoplasia (P7, P13, P15), hypoplastic corpus callosum with small flattened pituitary and ventriculomegaly (P5); prominent extra-axial CSF with some periventricular high signal in frontal lobes (P1).

**Infancy:** Many families reported feeding difficulties as neonates, with six subjects progressing to gastrostomy insertion. Early respiratory problems were also noted included tracheomalacia and respiratory distress requiring CPAP support. Hypoglycaemia was also reported.

**Malformations:** Malformations were uncommon: atrial septal defect (P7), and unilateral hydronephrosis with proximal hydroureter (P3).

## Supplemental Figures

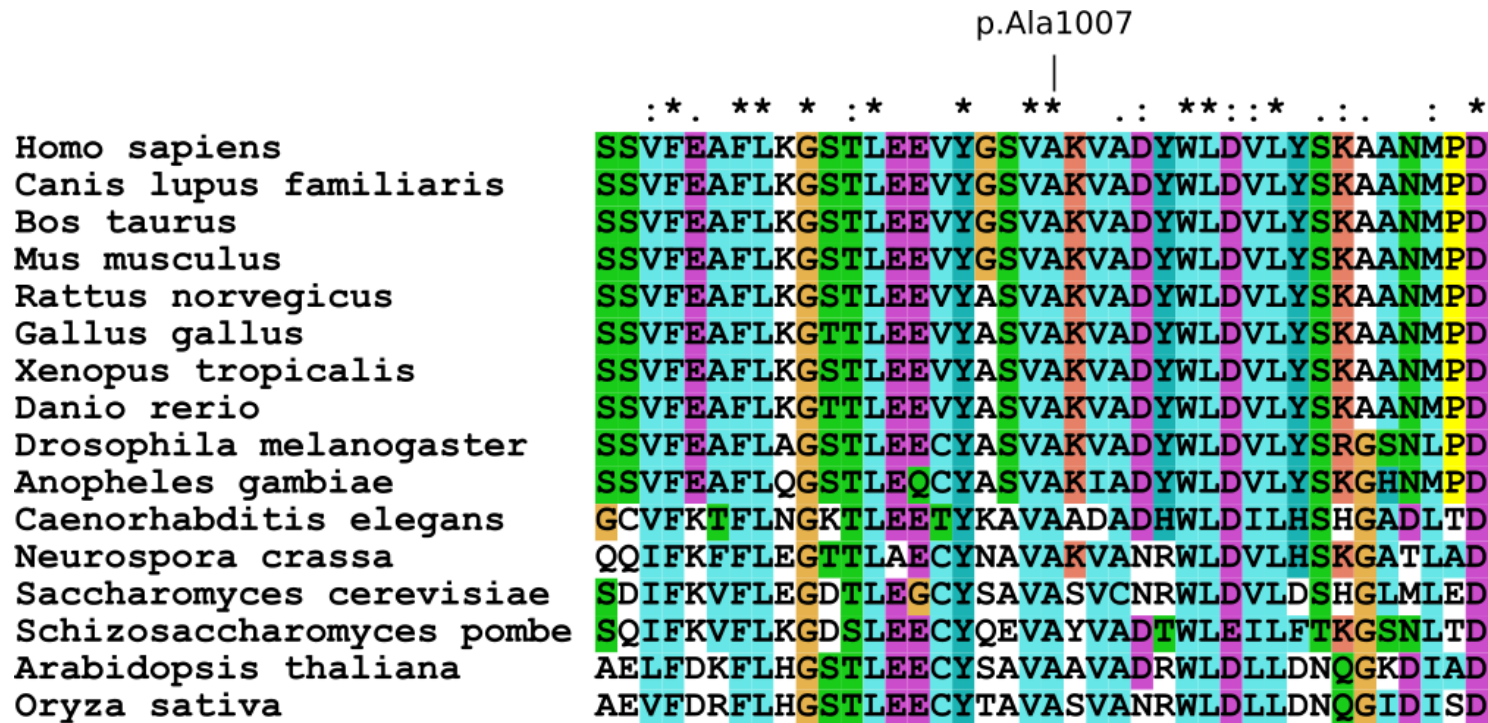

**Figure S1: ClustalX alignment of POLE1 orthologs showing human p.Ala1007 and flanking residues.**

The position of human alanine 1007 (mutated to proline in patient P10) is marked above the alignment. Asterisks indicate fully conserved positions, colons indicate positions with conservation between groups of strongly similar properties (PAM250 score > 0.5) and dots indicate conservation between groups with weakly similar properties (PAM250 score ≤ 0.5). Protein accessions used: Homo sapiens, NP\_006222.2; Canis lupus familiaris, XP\_543348.3; Bos taurus, NP\_001178358.1; Mus musculus, NP\_035262.2; Rattus norvegicus, NP\_001100622.2; Gallus gallus, XP\_004934482.1; Xenopus tropicalis, XP\_004910692.1; Danio rerio, NP\_001121995.1; Drosophila melanogaster, NP\_524462.2; Anopheles gambiae, XP\_315205.4; Caenorhabditis elegans, NP\_493616.1; Neurospora crassa, XP\_955939.2; Saccharomyces cerevisiae, NP\_014137.1; Schizosaccharomyces pombe, NP\_596354.1; Arabidopsis thaliana, NP\_172303.5; Oryza sativa, NP\_001046939.2.

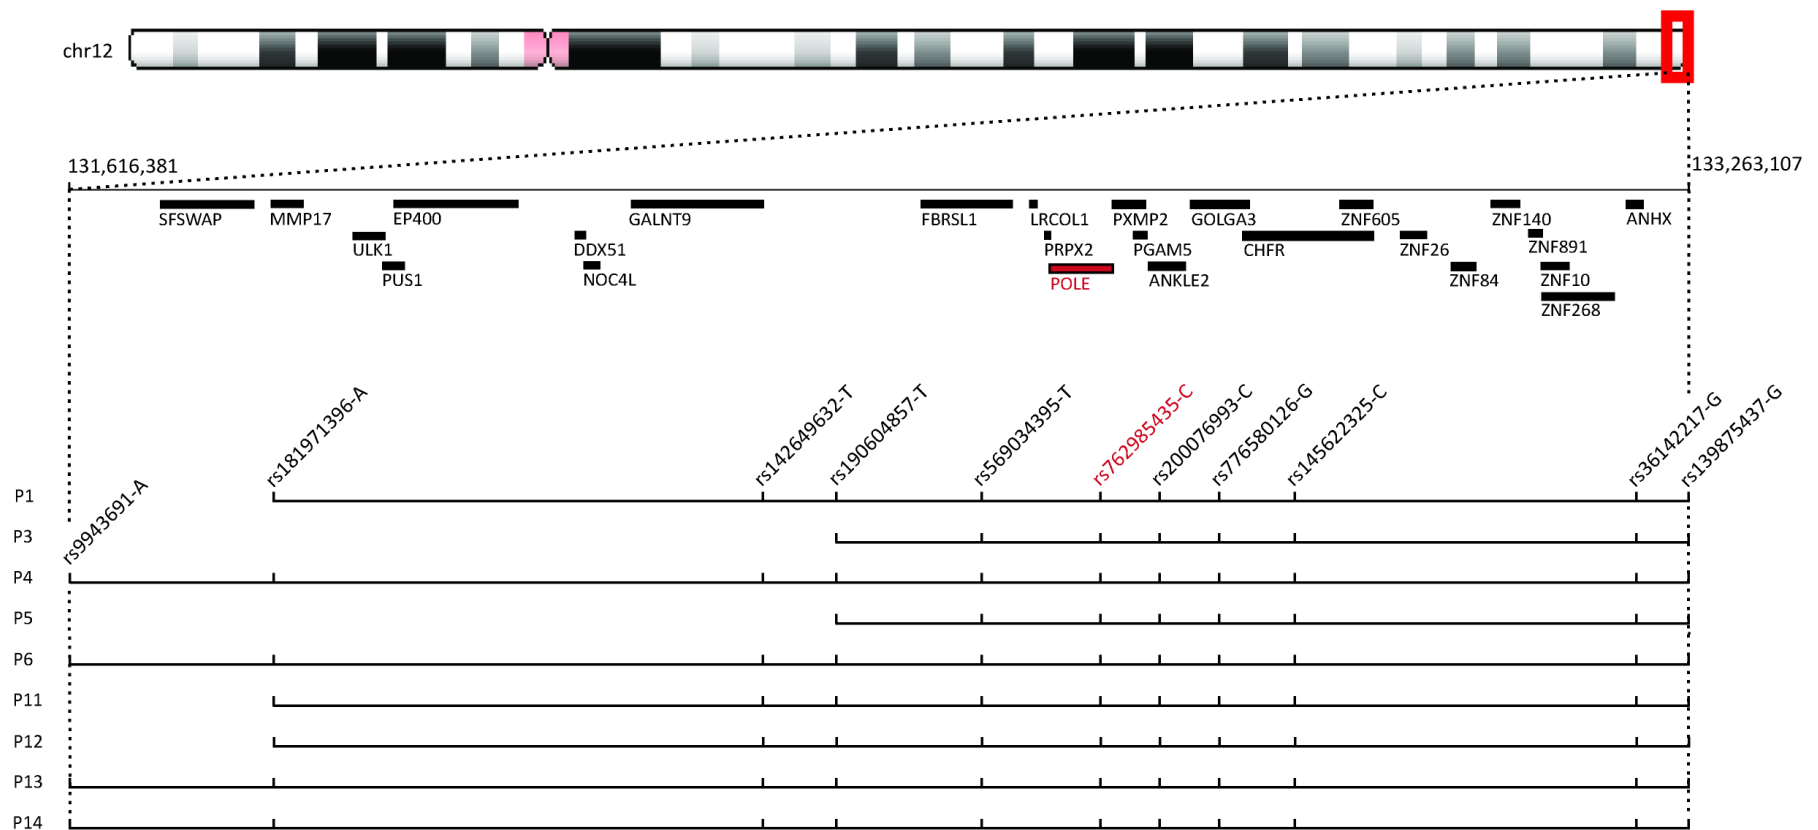

**Figure S2: Schematic of region of chromosome 12q24.33, depicting shared haplotype region.**

rs762985435 (red), c.1686+32C>G *POLE*. dbSNP identifiers and the allele present on the shared haplotype provided. Lines indicate the extent of the shared haplotype for different subjects.

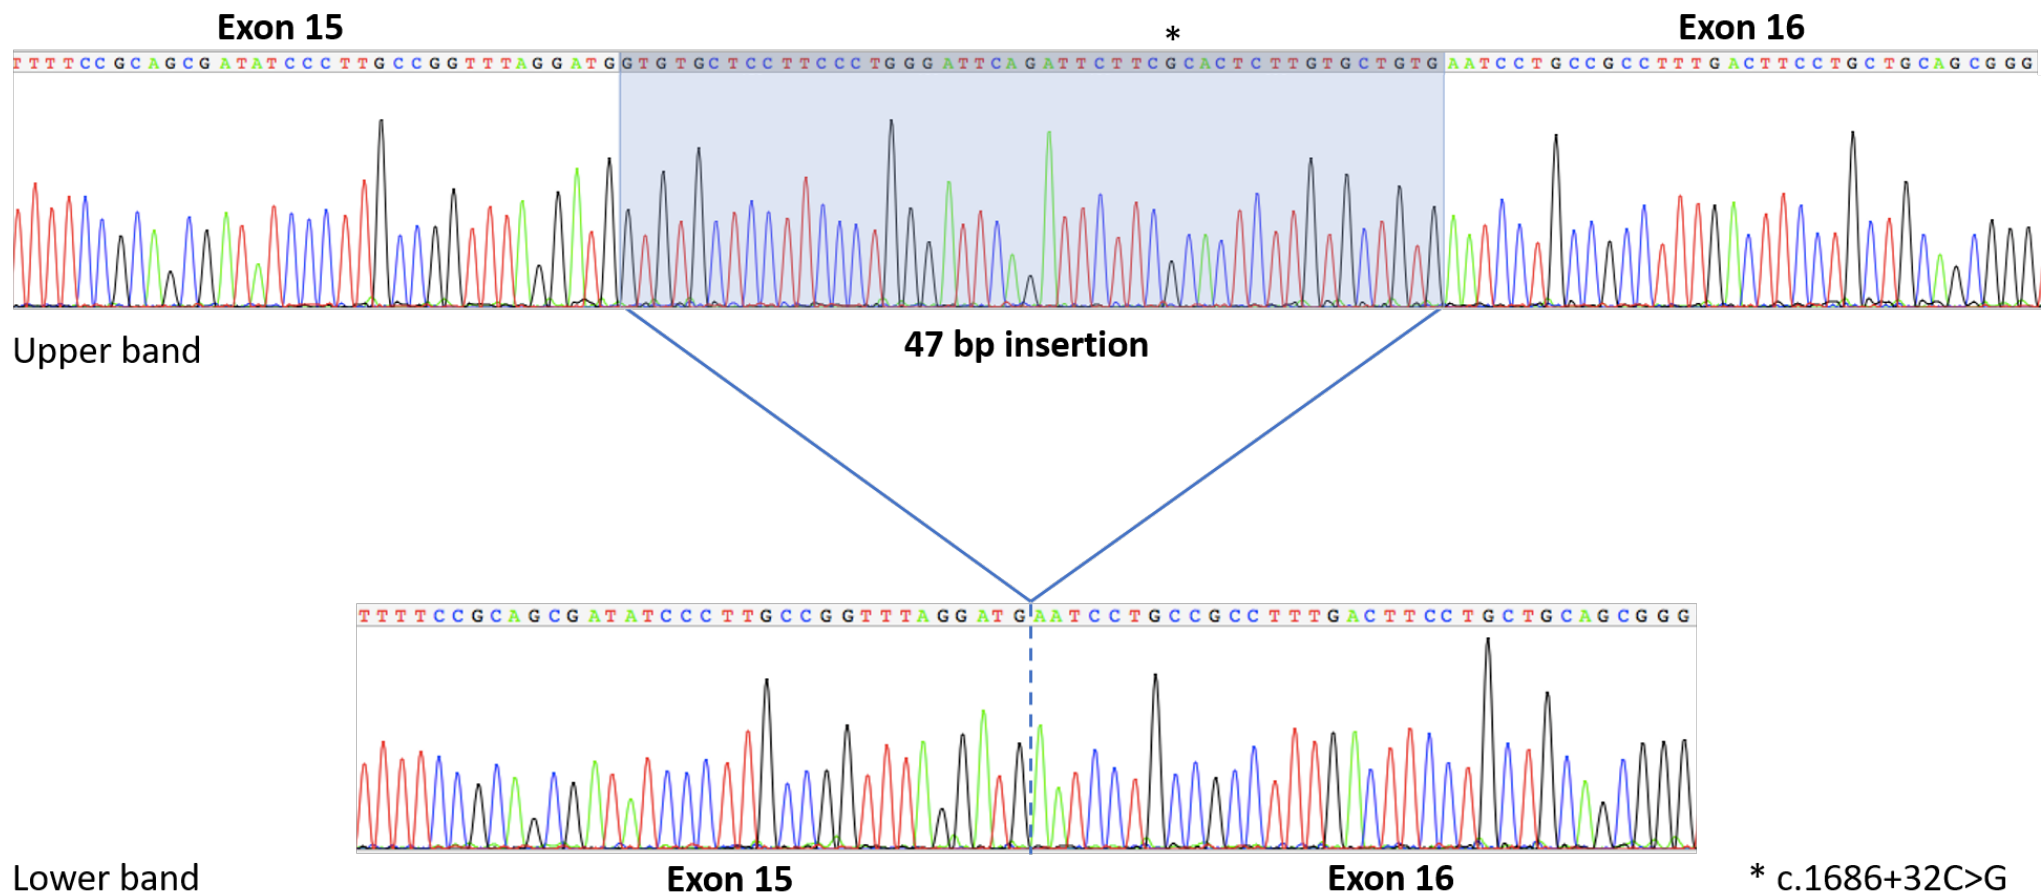

**Figure S3: Representative Sanger sequencing electropherograms of POLE transcripts from P1.**

*POLE* cDNA amplified with primers as indicated in Fig 3A, with sequence corresponding to upper and lower bands in this figure panel. The upper band includes 47 bp of intron 15 (highlighted in blue). The c.1686+32C>G variant is evident in the retained intronic sequence, indicated by asterisk.

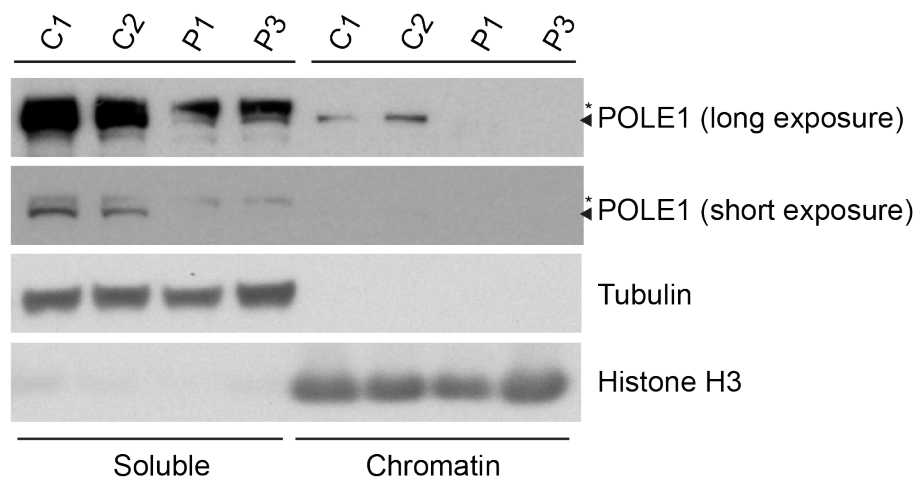

**Figure S4. Chromatin Fractionation and Immunoblotting of POLE1**

Western blot analysis of POLE1 from total soluble and chromatin fractions of control (C1, C2) and patient derived (P1, P3) primary fibroblasts lines. Antibody (GTX132100) raised against recombinant protein encompassing a sequence within the N-terminus region of human POLE1. Tubulin and Histone H3, loading controls respectively for soluble and chromatin-associated proteins. \* denotes, non-specific band. Short exposure, ~30s; long exposure, ~20mins.

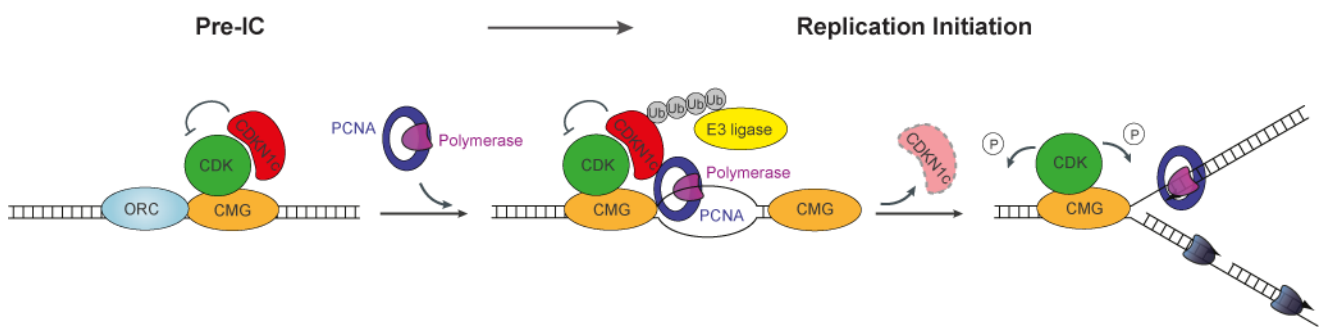

**Figure S5. Hypothetical model of functional relationship between CDKN1C and PCNA/DNA polymerase loading.**

Mutations in POLE1 and CDKN1C both cause IMAGE syndrome, suggesting a potential functional relationship. PCNA is required for CDKN1C ubiquitination<sup>2</sup>, and overexpression experiments have established that CDKN1C-IMAGE mutations both disrupt PCNA binding<sup>2</sup> and result in increased protein stability<sup>7; 8</sup>. However the context, cell-cycle timing and location for PCNA binding and CDKN1C degradation has not yet been established. Biochemical studies on *Xenopus* CDKN homologs using egg extracts suggest that CDKNs may inhibit CDK activity, until PCNA/polymerase loading onto DNA triggers their ubiquitination and proteolytic degradation during replication fork initiation<sup>9; 10</sup>. The relevance of these findings to somatic mammalian cells and CDKN1C remain to be determined. CDK, Cyclin dependent kinase; ORC, Origin Recognition Complex; CMG complex (CDC45, MCM2-7, GINS); Ub, ubiquitin; P, phosphorylation of target proteins by CDK.

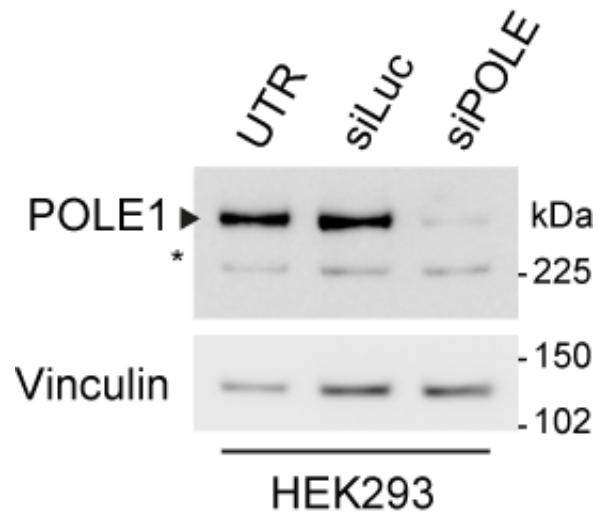

**Figure S6. Validation of POLE1 monoclonal antibody (93H3A).**

The antibody used (93H3A) was raised against recombinant human POLE1 corresponding to aa1-176. UTR, untransfected. siLuc, negative siRNA control. siPOLE, siRNA targeting *POLE* transcript. \*, non-specific band. Vinculin was used as a loading control.



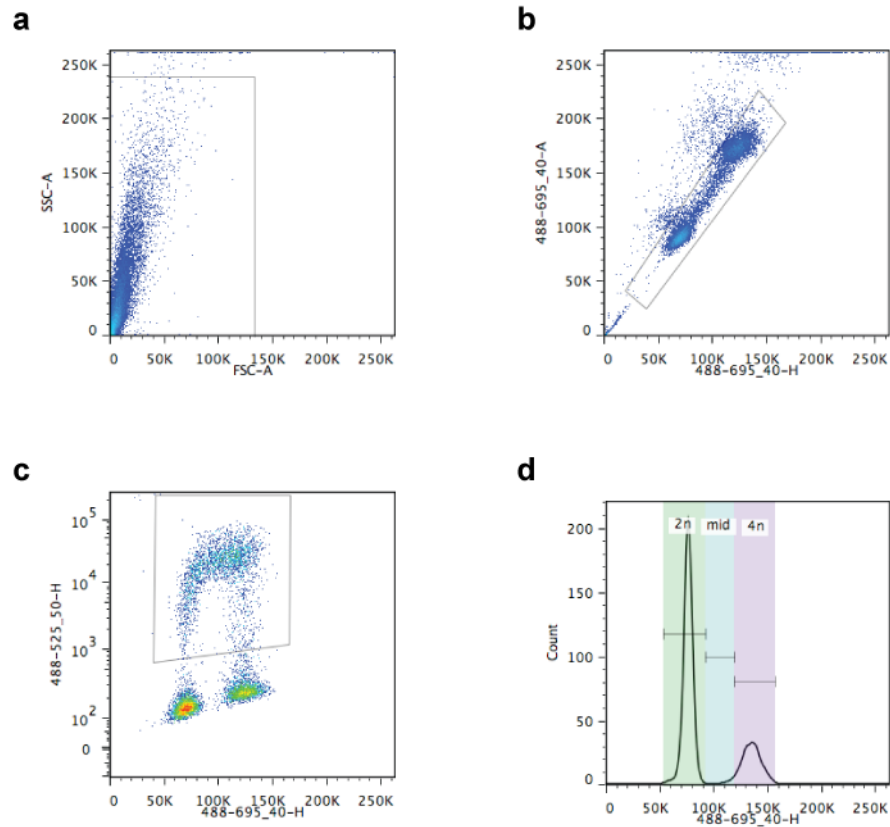

**Figure S7. Gating strategy for FACS-cell cycle analysis**, for experiment depicted in Fig 3c,d. Cells gated on FSC/SSC as indicated (a), and doublet cells then removed (b). BrdU-labelled population then gated (c), and 2n, 4n and mid-S phase populations defined (d). Representative plots for C1, 0 h time point (a-c), except bottom right (d) C1, 8 h time point shown, as 2n, 4n populations are most distinct at this time point

## Supplemental Tables

|                | <b>Primordial dwarfism</b> | <b>gnomAD All Populations</b> |
|----------------|----------------------------|-------------------------------|
| <b>LoF</b>     | 3                          | 198                           |
| <b>No LoF</b>  | 93                         | 277078                        |
| <b>P-Value</b> | 5.10 x 10 <sup>-5</sup>    |                               |

**Table S1. *POLE* Allele counts.** Whole-genome sequenced subjects from Primordial dwarfism cohort (n=48) versus gnomAD database (n=138,638, WGS/WES). *P*-value, one-tailed Fisher's exact test. LoF, loss of function.

| ID  | Prenatal Growth           |                      |                      |                   | Postnatal growth |                      |                      |                            |
|-----|---------------------------|----------------------|----------------------|-------------------|------------------|----------------------|----------------------|----------------------------|
|     | Gest <sup>n</sup><br>/wks | Weight<br>/kg (s.d.) | Length<br>/cm (s.d.) | OFC<br>/cm (s.d.) | Age at exam      | Weight<br>/kg (s.d.) | Height<br>/cm (s.d.) | OFC<br>/cm (s.d.)          |
| P1  | 31                        | 0.926 (-2.8)         | 35* (-5.8)           | 26.6 (-2.0)       | 18yrs            | 18.25 (-14)          | 109.9 (-9.6)         | 48.5 (-5.1)                |
| P3  | 41                        | 2.5 (-2.6)           | n/a                  | 34.8 (-0.8)       | 7yrs             | 15 (-3.9)            | 93.8 (-5.5)          | 49.4 (-2.7)                |
| P4  | 40+6                      | 2.49 (-2.4)          | n/a                  | n/a               | 50yrs            | n/a                  | 88 (-12.5)           | 46 (-8.03)                 |
| P5  | 39                        | 2.4 (-2.1)           | 42.5 (-3.9)          | 34 (-0.5)         | 11yrs 7mths      | 14.3 (-8.6)          | 99.2 (-6.8)          | 47.4 (-4.7)                |
| P6  | 35                        | 1.42 (-2.8)          | 40 (-3.5)            | 28 (-2.8)         | 9yrs 6mths       | 15 (-5.3)            | 100.7 (-5.7)         | 46.7 (-5.5)                |
| P7  | 38                        | 2.1 (-2.4)           | 41.9 (-3.8)          | n/a               | 13yrs            | 20.1 (-5.3)          | 106.1 (-6.2)         | 47 (-5.2)                  |
| P8  | 34                        | 1.3 (-2.8)           | n/a                  | n/a               | 2yrs 9mths       | 5 (-10.4)            | 66.6 (-7.5)          | 41 (-7.3)                  |
| P9  | 37                        | 1.56 (-3.3)          | n/a                  | n/a               | 1yr 7mths        | 4.4 (-9.3)           | 59.2 (-7.7)          | 42.5 (-4.7)                |
| P10 | 40                        | 1.45 (-4.9)          | 42 (-4.4)            | 32 (-2.1)         | 39yrs            | 13.8 (-16.8)         | 95.6 (-11.27)        | n/a                        |
| P11 | 37                        | 1.4 (-3.8)           | 39 (-4.8)            | 29 (-3.0)         | -                | n/a                  | n/a                  | n/a                        |
| P12 | 34                        | 1.26 (-2.8)          | 38 (-4.2)            | 28 (-2.3)         | 12yrs            | 11 (-9.14)           | 113 (-5.07)          | At 6 months<br>35.5 (-5.8) |
| P13 | 40                        | 2.07 (-3.2)          | 42 (-4.5)            | 33 (-1.7)         | -                | n/a                  | n/a                  | n/a                        |
| P14 | 36                        | 1.8 (-2.2)           | 44 (-1.7)            | 32.5 (-0.2)       | 18yrs 7mths      | 24.5 (-7.9)          | 112.7 (-8.4)         | n/a                        |
| P15 | 40                        | 1.35 (-3.9)          | 40 (-4.3)            | 30.5 (-2.2)       | 31yrs            | 16.8 (-15.6)         | 103 (-10.6)          | 'microcephaly'             |

**Table S2: Anthropometric measurements in *POLE* individuals with biallelic mutations.** ID, Individual number. Gest<sup>n</sup>, gestation. wks, weeks. s.d., Z-scores calculated with LMS growth using British 1990 dataset. \*measurement at age 3 weeks (first available postnatal measurement). P15 OFC measurement not available but documented to have microcephaly although OFC not as severe as height.

| ID  | Age      | Endocrine             |                  |                                                                                                                                                                   | Genitourinary           |                                  | Skin   |               |              |                                                 |
|-----|----------|-----------------------|------------------|-------------------------------------------------------------------------------------------------------------------------------------------------------------------|-------------------------|----------------------------------|--------|---------------|--------------|-------------------------------------------------|
|     |          | Adrenal Insufficiency | Age at diagnosis | Additional Information                                                                                                                                            | Hypospadias             | Bilateral Cryptorchidism         | Eczema | Café aux lait | Livedo       | Additional Information                          |
| P1  | 18yrs    | Y                     | 18mths           | Presented in adrenal crisis. Developed Insulin resistance, delayed puberty, fatty liver & hypertriglyceridaemia (likely related to stem cell transplant)          | Y                       | Y (descended later in childhood) | Y      | N             | N            |                                                 |
| P3  | 7yrs     | Y                     | 5yrs             | Presented with hypoglycaemic episodes. No response to GH therapy                                                                                                  | Y (mild)                | Y (hypoplastic scrotum)          | N      | N             | N            |                                                 |
| P4  | 50yrs    | N                     | -                | Normal cortisol but dynamic testing not performed                                                                                                                 | Female                  | Female                           | Y      | N             | N            |                                                 |
| P5  | 11yrs 7m | Y                     | 7yrs             | Neonatal hypothyroidism. Panhypopituitarism at 12 months including GH deficiency. Small, flattened pituitary on MRI.                                              | Y                       | Y                                | N      | N             | N            |                                                 |
| P6  | 9yrs 6m  | Y                     | Neonate          | Nephrocalcinosis & hypercalciuria at 6mths. GH deficiency.                                                                                                        | Female                  | Female                           | N      | N             | Intermittent | Psoriasis from 11 yrs, Livedo improved with age |
| P7  | 13yrs    | Y                     | Neonate          | Low GH identified at 14mths, low ACTH at 22mths with low cortisol, hypothyroid at 3yrs                                                                            | Y (ambiguous genitalia) | Y                                | Y      | N             | N            |                                                 |
| P8  | 4yrs 2m  | Y                     | 4yrs             | Hyponatraemia identified during prolonged viral infection. GH deficiency.                                                                                         | N                       | Y                                | N      | N             | N            |                                                 |
| P9  | 2yrs 3m  | N                     | -                | Normal cortisol but dynamic testing not performed                                                                                                                 | Female                  | Female                           | N      | N             | N            |                                                 |
| P10 | 39yrs    | Y                     | Neonate          | Pigmentation at birth. Presented with salt wasting crisis. GH deficiency but no response to GH therapy.                                                           | Female                  | Female                           | N      | Y             | N            |                                                 |
| P11 | 3m       | N                     | -                | -                                                                                                                                                                 | Female                  | Female                           | N      | Y             | N            |                                                 |
| P12 | 12yrs    | Y                     | Neonate          | No response to GH therapy. Diabetes. Affected sister (P11) found to have small adrenal glands with abnormal cortex and small pituitary on post-mortem examination | Female                  | Female                           | N      | N             | N            |                                                 |

|            |             |   |               |                                                                                                                                                                                                                |        |        |   |   |   |  |
|------------|-------------|---|---------------|----------------------------------------------------------------------------------------------------------------------------------------------------------------------------------------------------------------|--------|--------|---|---|---|--|
| <b>P13</b> | 8yrs        | Y | 4yrs<br>6mths | Progressive pigmentation at 4yrs. Small anterior pituitary on MRI. GH deficiency but no response to GH therapy.                                                                                                | Y      | Y      | N | Y | N |  |
| <b>P14</b> | 18yrs<br>7m | Y | 4yrs          | Hyponatraemic seizure at 4yrs. Hypercalcaemia in infancy. Normal cortisol at 6mths. Severe failure to thrive, chronic diarrhoea and pancreatic enzyme deficiency. GH deficiency with no response to GH therapy | Female | Female | N | Y | N |  |
| <b>P15</b> | 31yrs       | Y | 2yrs          | Presented with hypoglycaemia & seizures at 2yrs. Pituitary hypoplasia on MRI.                                                                                                                                  | N      | Y      | N | Y | N |  |

**Table S3: Endocrine, Genitourinary, Immune and Skin findings in POLE deficient individuals.** ID, Individual number. Growth Hormone (GH) deficiency established through provocative testing. P1, developed lactic acidosis during trial of metformin. Yrs, years; m, months.



|            |   |            |                        |              |                                  |                               |                           |                                         |                               |                                |                                  |                                   |                                                                                                   |  |
|------------|---|------------|------------------------|--------------|----------------------------------|-------------------------------|---------------------------|-----------------------------------------|-------------------------------|--------------------------------|----------------------------------|-----------------------------------|---------------------------------------------------------------------------------------------------|--|
|            |   |            | RSV                    |              | (1.5-7.4)                        |                               |                           |                                         |                               |                                |                                  |                                   |                                                                                                   |  |
| <b>P7</b>  | N | N          | N                      | N            | n/a                              | n/a                           | n/a                       | n/a                                     | n/a                           | n/a                            | n/a                              | n/a                               | n/a                                                                                               |  |
| <b>P8</b>  | Y | Y          | Y<br>Astrovirus<br>EBV | N            | Normal<br>5.64<br>(1.5-8.5)      | Normal<br>1236 (850-<br>1800) | Low<br>390 (650-<br>1500) | Low-<br>normal<br>552<br>(600-<br>1300) | Low<br>98<br>(180-<br>600)    | Normal<br>6.73<br>(4-16)       | Normal<br>2.97<br>(0.4-2)        | Normal<br>0.64<br>(0.5-2)         | Normal response to<br>vaccine*                                                                    |  |
| <b>P9</b>  | Y | Y          | Y<br>Norovirus         | N            | Normal                           | Normal<br>1853<br>(850-1800)  | Low<br>451<br>(650-1500)  | Normal<br>1079<br>(600-<br>1300)        | High<br>1018<br>(180-<br>600) | Normal<br>3.5<br>( 3.1-13)     | Normal<br>0.71<br>(0.3-1.2)      | Low<br>0.31<br>(0.5-2.2)          | Normal response to<br>vaccine*                                                                    |  |
| <b>P10</b> | N | N          | N                      | N            | Normal<br>2.8<br>(1.5-8)         | Normal                        | Normal                    | Normal                                  | Normal                        | 1.8                            | 4.3                              | 1.7                               |                                                                                                   |  |
| <b>P11</b> | Y | Klebseilla | N                      | N            | n/a                              | n/a                           | n/a                       | n/a                                     | n/a                           | n/a                            | n/a                              | n/a                               | Died at 3months with<br>Klebsiella pneumonia.                                                     |  |
| <b>P12</b> | N | N          | N                      | N            | n/a                              | n/a                           | n/a                       | n/a                                     | n/a                           | n/a                            | n/a                              | n/a                               |                                                                                                   |  |
| <b>P13</b> | N | N          | N                      | N            | n/a                              | n/a                           | n/a                       | n/a                                     | n/a                           | n/a                            | n/a                              | n/a                               |                                                                                                   |  |
| <b>P14</b> | Y | Y<br>MRSA  | N                      | Y<br>Candida | Normal<br>1.53<br>(1.0-<br>8.53) | Low<br>753<br>(2815-<br>6110) | Low<br>252<br>(394-1637)  | Normal<br>991<br>(179-<br>2657)         | n/a                           | Low<br>1.5<br>(2.86-<br>16.80) | Normal<br>0.11<br>(0.1-<br>1.29) | Normal<br>0.25<br>(0.21-<br>1.92) | Chronic cutaneous<br>candidiasis & MRSA<br>infection, T cell<br>proliferative responses<br>normal |  |
| <b>P15</b> | Y | N          | Y                      | N            | n/a                              | n/a                           | n/a                       | n/a                                     | n/a                           | Normal                         | Low                              | Undetec-<br>-table                | Chronic otitis media,<br>nodular sclerosis<br>Hodgkin's lymphoma<br>at 28yrs                      |  |

**Table S4: Immunological Phenotype in POLE deficient individuals.** Values included where available. Normal reference range for diagnostic lab where test performed in brackets. \*Measured for Hib, Tetanus and Pneumococcus. n/a not available. BMT Bone Marrow Transplant.

| Syndrome                | Clinical Features                                                                                                                                                         | Gene(s)                                    | Inheritance               | Molecular mechanism                                                                                             | References                                                                                                                                                                           |
|-------------------------|---------------------------------------------------------------------------------------------------------------------------------------------------------------------------|--------------------------------------------|---------------------------|-----------------------------------------------------------------------------------------------------------------|--------------------------------------------------------------------------------------------------------------------------------------------------------------------------------------|
| <b>FILS</b>             | Facial Dysmorphism, Immunodeficiency, Livedo and Short Stature                                                                                                            | <i>POLE</i><br>(2 families)                | AR                        | Biallelic partial loss of function, homozygous splice mutation predicted to reduce levels of Polymerase Epsilon | Schmid <i>et al</i> , 2012 <sup>6</sup> , Thiffault <i>et al</i> , 2015 <sup>11</sup>                                                                                                |
| <b>IMAGe Syndrome</b>   | Intrauterine Growth Restriction, Metaphyseal dysplasia, Adrenal Insufficiency, Genitourinary abnormalities in males<br>Plus variable immunodeficiency ( <i>POLE</i> only) | <i>CDKN1C</i>                              | AD (maternal allele only) | Imprinted gain of function mutations in PCNA binding domain.                                                    | Arboleda <i>et al</i> , 2012 <sup>2</sup>                                                                                                                                            |
|                         |                                                                                                                                                                           | <i>POLE</i>                                | AR                        | Biallelic loss of function mutations predicted to reduce levels of Polymerase Epsilon.                          | Current manuscript                                                                                                                                                                   |
| <b>MCM4 deficiency</b>  | Severe pre- and post-natal growth failure, Microcephaly, Immunodeficiency (decreased NK cells), Adrenal Insufficiency and cancer predisposition                           | <i>MCM4</i>                                | AR                        | Biallelic partial loss of function, homozygous splice mutations                                                 | Casey <i>et al</i> , 2012 <sup>12</sup> , Eidenschenk <i>et al</i> , 2006 <sup>13</sup> , Gineau <i>et al</i> , 2012 <sup>14</sup> , Hughes <i>et al</i> , 2012 <sup>15</sup> .      |
| <b>GINS1 deficiency</b> | Intrauterine growth deficiency, Immunodeficiency (NK cell deficiency and chronic neutropenia), eczema                                                                     | <i>GINS1</i>                               | AR                        | Biallelic partial loss of function mutations                                                                    | Bernard <i>et al</i> , 2004 <sup>16</sup> , Cottineau <i>et al</i> , 2017 <sup>17</sup>                                                                                              |
| <b>Meier Gorlin</b>     | Microtia, Hypoplastic/Absent Patella, Short Stature<br>Plus craniosynostosis ( <i>CDC45</i> only)                                                                         | <i>ORC1, ORC4, ORC6, CDT1, CDC6, CDC45</i> | AR                        | Biallelic partial loss of function mutations, impaired replication licencing                                    | Bicknell <i>et al</i> , 2011 <sup>18; 19</sup> , Bongers <i>et al</i> , 2001 <sup>20</sup> , de Munnik <i>et al</i> , 2012 <sup>21</sup> , Fenwick <i>et al</i> , 2016 <sup>22</sup> |
|                         |                                                                                                                                                                           | <i>GMNN</i>                                | AD                        | <i>De novo</i> gain of function mutations                                                                       | Burrage <i>et al</i> , 2015 <sup>23</sup>                                                                                                                                            |
| <b>Rothmund-Thomson</b> | Skin atrophy, telangiectasia, hyper-/hypopigmentation (poikiloderma congenitale), skeletal abnormalities, short stature, premature aging, cancer predisposition           | } <i>RECQL4</i>                            | AR                        | Biallelic loss and partial loss of function mutations                                                           | Kitao <i>et al</i> , 1999 <sup>24</sup> , Lindor <i>et al</i> , 2000 <sup>25</sup> , Wang <i>et al</i> , 2001 <sup>26</sup>                                                          |
| <b>Baller-Gerold</b>    | Craniosynostosis, radial aplasia, growth retardation, poikiloderma                                                                                                        |                                            |                           |                                                                                                                 | Van Maldergem <i>et al</i> , 2006 <sup>27</sup>                                                                                                                                      |
| <b>RAPADILINO</b>       | Radial and patella hypoplasia/aplasia, small stature, diarrhoea in infancy, dysmorphic features, cleft/high arched palate                                                 |                                            |                           |                                                                                                                 | Kaariainen <i>et al</i> , 1989 <sup>28</sup> , Siitonen <i>et al</i> , 2003 <sup>29</sup>                                                                                            |

**Table S5: Summary of clinical and molecular genetic findings associated with disorders of the replisome. AR Autosomal Recessive, AD Autosomal Dominant.**



## Materials and Methods:

### Research subjects

Genomic DNA was extracted from blood samples by standard methods or from saliva samples using Oragene collection kits according to the manufacturer's instructions. Informed consent was obtained from all participating families. The studies were approved by the ethics review boards, the Scottish Multicentre Research Ethics Committee (05/MRE00/74) and the University of Texas Southwestern Medical Center. Parents provided written consent for the publication of photographs of the affected individuals.

### Whole-Genome Sequencing, Whole-Exome Sequencing and Analysis

Whole Genome Sequencing in P1, P3 and P4 was performed by Edinburgh Genomics (Clinical Division) as part of the Scottish Genomes Project (SGP) to 30X coverage using TruSeq Nano library preparation kits and a HiSeq X sequencing platform (Illumina). FASTQs generated by Edinburgh Genomics were aligned to the human genome (hg38, including alt, decoy and HLA sequences) using bwa mem<sup>30</sup> (0.7.13). Post-processing was performed with samblaster<sup>31</sup> (0.1.22) to mark duplicate reads, and the Genome Analysis ToolKit<sup>32</sup> (GATK, v3.4-0-g7e26428) for indel realignment and base recalibration. Genotype likelihoods for each sample were calculated using the GATK HaplotypeCaller and resulting GVCF files were called jointly using GATK's GenotypeGVCFs function. Variant quality score recalibration (VQSR) was performed as per GATK best-practices<sup>33</sup> and a truth sensitivity threshold of 99.9% applied.

Functional annotations were added using Ensembl's Variant Effect Predictor<sup>34</sup> (v84). VASE (v0.1, <https://github.com/gantzgraf/vase>) was used to perform variant filtering and burden analysis. Variants were filtered to remove those outside the 99.9% truth sensitivity threshold from VQSR, with a frequency greater than 0.1% in gnomAD or dbSNP147, or in segmentally duplicated regions or regions of low sequence complexity. Allele counts were generated for genotype calls with a minimum PHRED scale genotype quality score of 20 for each canonical transcript in the GENCODE basic transcript set where the alternative allele resulted in predicted loss of function (stop gain, stop loss, splice donor/acceptor site disruption or indels resulting in frameshifts). Allele counts per transcript were compared with variant data from gnomAD<sup>35</sup>.

WGS in P10-14 was performed by the Hudson Alpha Genome sequencing Centre to an average 40X coverage using a HiSeq platform (Illumina) and analysed using DRAGEN software (Edico Genome). Whole Exome Sequencing in P5 and P6 was performed as described previously<sup>36</sup>. WES in P15 was performed as previously described<sup>37; 38</sup>.

All *POLE* variants identified were confirmed by capillary sequencing, using standard methodology. Details of primers listed below.

### Haplotype Analysis

Variants surrounding rs762985435 were identified from WGS and WES VCF files and analysed for shared haplotypes in samples with this SNP using bespoke software (available at [https://github.com/gantzgraf/het\\_hap\\_phaser](https://github.com/gantzgraf/het_hap_phaser)).

### Cell Culture

Primary dermal fibroblasts (Patient P2, P3) were established from skin punch biopsies in AmnioMax medium (Life Technologies) and then maintained in Dulbecco's MEM (modified Eagle's medium; DMEM) supplemented with 10% fetal bovine serum, 5% L-glutamine and 5% penicillin/streptomycin, at 5% CO<sub>2</sub> and 3% O<sub>2</sub>. Patient 1 primary fibroblasts were a kind gift from Prof. Penny Jeggo, University of Sussex. Genotypes of patient cell lines were validated by Sanger sequencing and immunoblotting.

### RT-PCR

Total RNA was extracted from cell lines using the RNeasy kit (Qiagen) according to the manufacturer's instructions. Following DNase I (Qiagen) treatment cDNA was generated using SuperScript III Reverse Transcriptase kit (Thermo Fisher Scientific). RT-PCR was performed on cDNA using primers in exon 14 and 17 (details below).

### **Mini-Gene Assay**

A 1.6 kb stretch of the *POLE* gene encompassing the 3' end of intron 12, exon 13, intron 13, exon 14, intron 14, exon 15, intron 15, exon 16 and the 5' end of intron 16 was amplified using DNA from control genomic DNA with Sall-pole-int12-F and Xbal-pole-int16-R primers, and cloned into the RHCglo vector<sup>39</sup> using Sall and Xbal restriction sites. Site-directed mutagenesis was used to introduce the *POLE* intron 15 patient mutation c.1686+32C>G and as a positive control, *POLE* intron 15 splice donor mutation (c.1686+1G>A) into the splicing reporter construct. HeLa cells were transfected with each individual splicing mutation reporter construct using Lipofectamine 2000 according to the manufacturer's instructions. Twenty-four hours after transfection, cells were harvested, total cellular RNA extracted, and cDNA generated using Superscript III reverse transcriptase first-stand synthesis system (Invitrogen). PCR was carried out using primers (RSV5U-minigene-F and RTRHC-minigene-R) to the 5' and 3' ends of the artificial exons present in the RHCglo vector. cDNA amplicons for WT and mutated *POLE* were resolved on a 2% agarose gel to visualize differences in splicing. Individual PCR products were subsequently cloned into the pGEM-T Easy Vector (Promega) and sequenced to verify the exon content of each transcript. All relevant primers details are listed below.

### **Western blot analysis and antibodies**

Whole cell extracts were obtained by lysis and sonication of cells in UTB buffer (8 M Urea, 50 mM Tris pH 7.5, 150 mM  $\beta$ -mercaptoethanol, protease inhibitor cocktail (Roche)) or in NP-40 lysis buffer (50 mM Tris pH 8.0, 280 mM NaCl, 0.5% NP-40, 0.2 mM EDTA, 0.2 mM EGTA, 10% Glycerol, 1 mM DTT, protease inhibitor cocktail (Roche), 1 mM PMSF, phosphatase inhibitors (40 mM NaF, 1 mM sodium orthovanadate)) and analyzed by SDS-PAGE following standard procedures. Protein samples were run on 6-12% acrylamide SDS-PAGE or 4-12% NuPage mini-gels (Life Technologies) and transferred onto nitrocellulose membrane. Immunoblotting was performed using antibodies to POLE (93H3A clone; ThermoFisher Scientific cat# MA5-13616 at 2  $\mu$ g/ml) and Vinculin (2C6-1B5 clone; Novusbio cat# H00007414-M01 1/5,000 dilution) (Figure S6). Chromatin fractionation experiments were performed as described in Bellelli *et al.*, 2014<sup>40</sup>, immunoblotting with POLE antibody, GTX132100, GeneTex.

### **FACS analysis**

Non-confluent, primary fibroblasts grown in AmnioMax medium (Life Technologies) were pulse labeled with 10  $\mu$ M BrdU for 30 min, washed and then harvested at 0, 4 and 8 h time points before fixation with 70% ethanol at -20°C for 16 h. Fixed cells were then digested with 1 mg/ml pepsin, denatured in 2 M HCl, and washed with PBS. After blocking in 0.5% BSA, 0.5% Tween-20, BrdU labelling was detected using anti-BrdU antibody (Abcam, ab6326; 1:75) and FITC-conjugated anti-rat secondary antibody, and DNA content determined by co-staining with 50  $\mu$ g/ml propidium iodide. Cells were sorted on a BD Biosciences FACS Aria II and data analyzed using FlowJo software (v7.6.1, Tree Star) (Figure S7).

### **Code Availability**

All custom code used in this study available at github.com (<https://github.com/gantzgraf/vase> and [https://github.com/gantzgraf/het\\_hap\\_phaser](https://github.com/gantzgraf/het_hap_phaser)) licensed under the MIT free software license.

**Primer sequences for screening of *POLE* exons and flanking sequences**

| <b>Exon</b> | <b>Forward Primer Sequence 5'-3'</b> | <b>Reverse Primer Sequence 5'-3'</b> |
|-------------|--------------------------------------|--------------------------------------|
| 1           | ATTTCCGGCTCTCGCGAG                   | CCCTACCCCAGTCAGGCG                   |
| 2           | TGTCGCCTGTGGTCCCAG                   | CTCATGTGTCCCCACTCTT                  |
| 3           | AGTGCTGAGTTTCCCGAAAG                 | CCTCCCTGACAGTCACAGAG                 |
| 4           | GGAGCAAGCAATGTGTTTTCA                | GCTCACAACCCTAATCAGGATC               |
| 5           | CTGTGGTGGGCTTTGCAAC                  | GATCCCACCTGCCAGGAA                   |
| 6           | GTGCAGAGTTGGACAAGGTG                 | ACAGAGCCAGCCATTAAGGT                 |
| 7           | TCCTCGGTTTGAACCTGCTGT                | CCTGCAAAACACACAGTGTG                 |
| 8           | GCCTCTCCATTGACCTGAAG                 | TTTGGGGGAAAAGCAGCAAA                 |
| 9           | AGAGGGAGGTAGAGCAGGC                  | AACAGTGGGGCAGATGCT                   |
| 10          | TAGGCAGAGTGTGTGGGC                   | GCCTGAGGCCTTGAAAGAT                  |
| 11          | ACTTTGGGAGAGGAATTTGGAA               | CTAAGTCGACATGGGAAGCG                 |
| 12          | GGGAGGAATGGAGAAAGGGG                 | GATGTGGTGACAGCACAGTC                 |
| 13          | GTTTTGCCAGTTCTCAGGGG                 | AGGACAAAACACGTGTGTCC                 |
| 14          | CAGGCTTTGCTTTCTGTGCT                 | CAGCTCCAGTGCATTTGGAA                 |
| 15          | TAGGTTCTGGACTTTGCCT                  | TGGGACAGGATGGGGAGA                   |
| 16          | GAGCTTTCTCGGGCACAAC                  | CTGCTGAAAGACGTGGTCTG                 |
| 17          | AAAAGGGGTTGGTGAACCTGC                | TTCGTCCACCATGGCAGAG                  |
| 18          | GCCTGCAGGTGAGACTTTAC                 | CAAAAGGAGGCACAGACACA                 |
| 19          | GGGCGAGTTCAGTGAGTGT                  | CCAGCTGGGATGGACCAA                   |
| 20          | ATGTTCTTCAGCACCCCTGT                 | AGTGCCCACTTCATGAGCC                  |
| 21          | TGTACACTCTTCATTGTAAGTGT              | TGAATCAGATGAACGGCCCT                 |
| 22          | CCTCTCCCTACTCCTCACT                  | TTCCTTCTGCCAGTGTG                    |
| 23          | GAAGGAGGGAAGGCTGGAG                  | TGCAGAGCCAGTGACATCAG                 |
| 24          | TGTGGAAAAGCCTCGGTTTG                 | ATCCTGGCTCCTGATCCAAC                 |
| 25          | AGAGGATGAGGCACAGCTG                  | TGTTCTTCGGTCACCTTGGT                 |
| 26          | CTAGAGGAGCACAGTCCAGG                 | TGGACAATTATGCCATCCCC                 |
| 27          | CGTCCTATTTCCATGTTCAATTTGA            | AGTGAAGACGCCAGACAAAA                 |
| 28          | CCTGTGCTCAGCATGAAGTG                 | AGGCCAACACCCATCAGAG                  |
| 29          | GCGCCATCCAGAAGATCATC                 | CACTACAGCACACACAGCAG                 |
| 30          | CAATTCTCCTGTCTTGGCCT                 | CTCCCTAGGGGTCAGGAC                   |
| 31          | GGAGGCTGCTTGTGAGAAAG                 | CTCCCATCCCAGACCTCAG                  |
| 32          | CATCGTAGGGAGGCCTAAGG                 | TCACACACGTTGTTTTGAGGA                |
| 33          | AGGACTCCGAATAGCGTGTG                 | GACTTCTGCCCGGGATGT                   |
| 34          | ATCCCGGGCAGAAGTCAC                   | GCGGATACTCCCTGGAGAAG                 |
| 35          | AGTTCAGCTACCTGGAACCA                 | GGACAAGACCTGGAGGGC                   |
| 36          | CTTTGCCCATGAGTGCTTGT                 | CCTGGGTCAAGGCAAAATGG                 |
| 37          | GCTGTGTGAGCCCCATCTT                  | CACCAGGGCACAGGTCAG                   |
| 38          | TACTGTGCTTGTGGGCCAG                  | TGCCTTGAGAAGATGTCACAG                |
| 39          | CTGGTTCTGGAGGTGGTGG                  | GCCCAATGGACCCTGTCTTA                 |
| 40          | GGGAAAACCTGTGCCCATTT                 | CATGTCTCTGGTTCTGGGGA                 |
| 41          | ACCCTCAGCTCTTTTCCCTC                 | GCTGCTCAGATTCACCATGG                 |
| 42          | ACAAGGGGAAATAAAGGAAAGTTG             | CACACTGACGTGCTTGTCTG                 |
| 43          | AGGAAGGCCTCTGGTCAAAC                 | GATACCATGGCACAGGAGC                  |
| 44          | TCTGTGAGGCAATCTGACCA                 | ATAAGGATGCTGAGGGAGGG                 |
| 45          | GTGCCAGTGACCTAACTCCT                 | TACAGCCTCACCTTGACA                   |
| 46          | GTTCTGGTCCAGACAGAGCA                 | ATCCATGTGAGTCAGAGGGG                 |
| 47          | ACCAGGCGCTTCTCACAG                   | CCCCTTGAAGACACCAGG                   |

| Exon | Forward Primer Sequence 5'-3' | Reverse Primer Sequence 5'-3' |
|------|-------------------------------|-------------------------------|
| 48   | GGGATGAGGTCGTGCATTTT          | TAGTGCTGGGCAATGTTCCG          |
| 49   | CTCTCCCTCATCTGCCTCG           | AGTGGTCTGGTCACTGGAAG          |

### RT PCR primer sequences

| RT PCR primers  | sequence 5'-3'       |
|-----------------|----------------------|
| RT PCR primer F | TCTGGCCACGTATTCTGTGT |
| RT PCR primer R | CTTCAGGGAGGCAAGCTTG  |

### Primers used for minigene assay cloning, mutagenesis and PCR

| Primer              | sequence 5'-3'                     |
|---------------------|------------------------------------|
| Sall-pole-int12-F   | TCTAGTCGACCTGCATGTTAGAATCATCCTG    |
| Xbal-pole-int16-R   | CTAGTCTAGAGTGGTCTGTGAAGAAGGCG      |
| pole-c.1686+32C>G F | CTGGGATTCAGATTCTTCGCACTCTTGTGCTGTG |
| pole-c.1686+32C>G R | CACAGCACAAGAGTGCGAAGAATCTGAATCCCAG |
| pole-c.1686+1G>A F  | CCCTTGCCGGTTTAGGATGATGTGCTTCTTCC   |
| pole-c.1686+1G>A R  | GGAAGAAGCACATCATCCTAAACCGGCAAGGG   |
| RSV5U-minigene-F    | CATCACCACATTGGTGTGC                |
| RTRHC-minigene-R    | GGGCTTTCAGCAACAGTAAC               |

### Antibodies used in experimental procedures

| Antibody                                    | Antibody species | Application | Manufacturer      | Catalogue Number |
|---------------------------------------------|------------------|-------------|-------------------|------------------|
| Anti-POLE Monoclonal Antibody (93H3A)       | Mouse            | WB          | Thermo Fisher     | MA5-13616        |
| Anti-Vinculin Antibody (2C6-1B5)            | Mouse            | WB          | Novus Biologicals | H00007414-M01    |
| Monoclonal Anti- $\alpha$ -Tubulin Antibody | Mouse            | WB          | Sigma-Aldrich     | T9026            |
| Anti-Histone H3 antibody                    | Mouse            | WB          | Abcam             | ab10799          |
| Anti-POLE antibody                          | Rabbit           | WB          | GeneTex           | GTX132100        |
| Anti-BrdU antibody                          | Rat              | FACS        | Abcam             | ab6326           |

## References

1. Vilain, E., Le Merrer, M., Lecointre, C., Desangles, F., Kay, M.A., Maroteaux, P., and McCabe, E.R. (1999). IMAGE, a new clinical association of intrauterine growth retardation, metaphyseal dysplasia, adrenal hypoplasia congenita, and genital anomalies. *J Clin Endocrinol Metab* 84, 4335-4340.
2. Arboleda, V.A., Lee, H., Parnaik, R., Fleming, A., Banerjee, A., Ferraz-de-Souza, B., Delot, E.C., Rodriguez-Fernandez, I.A., Braslavsky, D., Bergada, I., et al. (2012). Mutations in the PCNA-binding domain of CDKN1C cause IMAGE syndrome. *Nat Genet* 44, 788-792.
3. Bennett, J., Schrier Vergano, S.A., and Deardorff, M.A. (1993). IMAGE Syndrome. In *GeneReviews*((R)), M.P. Adam, H.H. Ardinger, R.A. Pagon, S.E. Wallace, L.J.H. Bean, K. Stephens, and A. Amemiya, eds. (Seattle (WA)).
4. Pedreira, C.C., Savarirayan, R., and Zacharin, M.R. (2004). IMAGE syndrome: a complex disorder affecting growth, adrenal and gonadal function, and skeletal development. *J Pediatr* 144, 274-277.
5. Tan, T.Y., Jameson, J.L., Campbell, P.E., Ekert, P.G., Zacharin, M., and Savarirayan, R. (2006). Two sisters with IMAGE syndrome: cytomegalic adrenal histopathology, support for autosomal recessive inheritance and literature review. *Am J Med Genet A* 140, 1778-1784.
6. Pachlopnik Schmid, J., Lemoine, R., Nehme, N., Cormier-Daire, V., Revy, P., Debeurme, F., Debre, M., Nitschke, P., Bole-Feysot, C., Legeai-Mallet, L., et al. (2012). Polymerase epsilon1 mutation in a human syndrome with facial dysmorphism, immunodeficiency, livedo, and short stature ("FILS syndrome"). *J Exp Med* 209, 2323-2330.
7. Hamajima, N., Johmura, Y., Suzuki, S., Nakanishi, M., and Saitoh, S. (2013). Increased protein stability of CDKN1C causes a gain-of-function phenotype in patients with IMAGE syndrome. *PLoS One* 8, e75137.
8. Borges, K.S., Arboleda, V.A., and Vilain, E. (2015). Mutations in the PCNA-binding site of CDKN1C inhibit cell proliferation by impairing the entry into S phase. *Cell Div* 10, 2.
9. Furstenthal, L., Swanson, C., Kaiser, B.K., Eldridge, A.G., and Jackson, P.K. (2001). Triggering ubiquitination of a CDK inhibitor at origins of DNA replication. *Nat Cell Biol* 3, 715-722.
10. Chuang, L.C., and Yew, P.R. (2005). Proliferating cell nuclear antigen recruits cyclin-dependent kinase inhibitor Xic1 to DNA and couples its proteolysis to DNA polymerase switching. *J Biol Chem* 280, 35299-35309.
11. Thiffault, I., Saunders, C., Jenkins, J., Raje, N., Canty, K., Sharma, M., Grote, L., Welsh, H.I., Farrow, E., Twist, G., et al. (2015). A patient with polymerase E1 deficiency (POLE1): clinical features and overlap with DNA breakage/instability syndromes. *BMC Med Genet* 16, 31.
12. Casey, J.P., Nobbs, M., McGettigan, P., Lynch, S., and Ennis, S. (2012). Recessive mutations in MCM4/PRKDC cause a novel syndrome involving a primary immunodeficiency and a disorder of DNA repair. *J Med Genet* 49, 242-245.
13. Eidenschenk, C., Jouanguy, E., Alcais, A., Mention, J.J., Pasquier, B., Fleckenstein, I.M., Puel, A., Gineau, L., Carel, J.C., Vivier, E., et al. (2006). Familial NK cell deficiency associated with impaired IL-2- and IL-15-dependent survival of lymphocytes. *J Immunol* 177, 8835-8843.
14. Gineau, L., Cognet, C., Kara, N., Lach, F.P., Dunne, J., Veturi, U., Picard, C., Trouillet, C., Eidenschenk, C., Aoufouchi, S., et al. (2012). Partial MCM4 deficiency in patients with growth retardation, adrenal insufficiency, and natural killer cell deficiency. *J Clin Invest* 122, 821-832.
15. Hughes, C.R., Guasti, L., Meimaridou, E., Chuang, C.H., Schimenti, J.C., King, P.J., Costigan, C., Clark, A.J., and Metherell, L.A. (2012). MCM4 mutation causes adrenal failure, short stature, and natural killer cell deficiency in humans. *J Clin Invest* 122, 814-820.
16. Bernard, F., Picard, C., Cormier-Daire, V., Eidenschenk, C., Pinto, G., Bustamante, J.C., Jouanguy, E., Teillac-Hamel, D., Colomb, V., Funck-Brentano, I., et al. (2004). A novel developmental and immunodeficiency syndrome associated with intrauterine growth retardation and a lack of natural killer cells. *Pediatrics* 113, 136-141.

17. Cottineau, J., Kottemann, M.C., Lach, F.P., Kang, Y.H., Vely, F., Deenick, E.K., Lazarov, T., Gineau, L., Wang, Y., Farina, A., et al. (2017). Inherited GINS1 deficiency underlies growth retardation along with neutropenia and NK cell deficiency. *J Clin Invest* 127, 1991-2006.
18. Bicknell, L.S., Bongers, E.M., Leitch, A., Brown, S., Schoots, J., Harley, M.E., Aftimos, S., Al-Aama, J.Y., Bober, M., Brown, P.A., et al. (2011). Mutations in the pre-replication complex cause Meier-Gorlin syndrome. *Nat Genet* 43, 356-359.
19. Bicknell, L.S., Walker, S., Klingseisen, A., Stiff, T., Leitch, A., Kerzendorfer, C., Martin, C.A., Yeyati, P., Al Sanna, N., Bober, M., et al. (2011). Mutations in ORC1, encoding the largest subunit of the origin recognition complex, cause microcephalic primordial dwarfism resembling Meier-Gorlin syndrome. *Nat Genet* 43, 350-355.
20. Bongers, E.M., Opitz, J.M., Fryer, A., Sarda, P., Hennekam, R.C., Hall, B.D., Superneau, D.W., Harbison, M., Poss, A., van Bokhoven, H., et al. (2001). Meier-Gorlin syndrome: report of eight additional cases and review. *Am J Med Genet* 102, 115-124.
21. de Munnik, S.A., Bicknell, L.S., Aftimos, S., Al-Aama, J.Y., van Bever, Y., Bober, M.B., Clayton-Smith, J., Edrees, A.Y., Feingold, M., Fryer, A., et al. (2012). Meier-Gorlin syndrome genotype-phenotype studies: 35 individuals with pre-replication complex gene mutations and 10 without molecular diagnosis. *Eur J Hum Genet* 20, 598-606.
22. Fenwick, A.L., Kliszczak, M., Cooper, F., Murray, J., Sanchez-Pulido, L., Twigg, S.R.F., Goriely, A., McGowan, S.J., Miller, K.A., Taylor, I.B., et al. (2016). Mutations in CDC45, Encoding an Essential Component of the Pre-initiation Complex, Cause Meier-Gorlin Syndrome and Craniosynostosis. *American Journal of Human Genetics*.
23. Burrage, L.C., Charng, W.L., Eldomery, M.K., Willer, J.R., Davis, E.E., Lugtenberg, D., Zhu, W., Leduc, M.S., Akdemir, Z.C., Azamian, M., et al. (2015). De Novo GMNN Mutations Cause Autosomal-Dominant Primordial Dwarfism Associated with Meier-Gorlin Syndrome. *Am J Hum Genet* 97, 904-913.
24. Kitao, S., Shimamoto, A., Goto, M., Miller, R.W., Smithson, W.A., Lindor, N.M., and Furuichi, Y. (1999). Mutations in RECQL4 cause a subset of cases of Rothmund-Thomson syndrome. *Nat Genet* 22, 82-84.
25. Lindor, N.M., Furuichi, Y., Kitao, S., Shimamoto, A., Arndt, C., and Jalal, S. (2000). Rothmund-Thomson syndrome due to RECQ4 helicase mutations: report and clinical and molecular comparisons with Bloom syndrome and Werner syndrome. *Am J Med Genet* 90, 223-228.
26. Wang, L.L., Levy, M.L., Lewis, R.A., Chintagumpala, M.M., Lev, D., Rogers, M., and Plon, S.E. (2001). Clinical manifestations in a cohort of 41 Rothmund-Thomson syndrome patients. *Am J Med Genet* 102, 11-17.
27. Van Maldergem, L., Siitonen, H.A., Jalkh, N., Chouery, E., De Roy, M., Delague, V., Muenke, M., Jabs, E.W., Cai, J., Wang, L.L., et al. (2006). Revisiting the craniosynostosis-radial ray hypoplasia association: Baller-Gerold syndrome caused by mutations in the RECQL4 gene. *J Med Genet* 43, 148-152.
28. Kaariainen, H., Ryppy, S., and Norio, R. (1989). RAPADILINO syndrome with radial and patellar aplasia/hypoplasia as main manifestations. *Am J Med Genet* 33, 346-351.
29. Siitonen, H.A., Sotkasiira, J., Biervliet, M., Benmansour, A., Capri, Y., Cormier-Daire, V., Crandall, B., Hannula-Jouppi, K., Hennekam, R., Herzog, D., et al. (2009). The mutation spectrum in RECQL4 diseases. *Eur J Hum Genet* 17, 151-158.
30. Li, H. (2013). Aligning sequence reads, clone sequences and assembly contigs with BWA-MEM.
31. Faust, G.G., and Hall, I.M. (2014). SAMBLASTER: fast duplicate marking and structural variant read extraction. *Bioinformatics* 30, 2503-2505.
32. McKenna, A., Hanna, M., Banks, E., Sivachenko, A., Cibulskis, K., Kernytsky, A., Garimella, K., Altshuler, D., Gabriel, S., Daly, M., et al. (2010). The Genome Analysis Toolkit: a MapReduce framework for analyzing next-generation DNA sequencing data. *Genome Res* 20, 1297-1303.

33. Van der Auwera, G.A., Carneiro, M.O., Hartl, C., Poplin, R., Del Angel, G., Levy-Moonshine, A., Jordan, T., Shakir, K., Roazen, D., Thibault, J., et al. (2013). From FastQ data to high confidence variant calls: the Genome Analysis Toolkit best practices pipeline. *Curr Protoc Bioinformatics* 43, 11 10 11-33.
34. McLaren, W., Gil, L., Hunt, S.E., Riat, H.S., Ritchie, G.R., Thormann, A., Flicek, P., and Cunningham, F. (2016). The Ensembl Variant Effect Predictor. *Genome Biol* 17, 122.
35. Lek, M., Karczewski, K.J., Minikel, E.V., Samocha, K.E., Banks, E., Fennell, T., O'Donnell-Luria, A.H., Ware, J.S., Hill, A.J., Cummings, B.B., et al. (2016). Analysis of protein-coding genetic variation in 60,706 humans. *Nature* 536, 285-291.
36. Martin, C.A., Ahmad, I., Klingseisen, A., Hussain, M.S., Bicknell, L.S., Leitch, A., Nurnberg, G., Toliat, M.R., Murray, J.E., Hunt, D., et al. (2014). Mutations in *PLK4*, encoding a master regulator of centriole biogenesis, cause microcephaly, growth failure and retinopathy. *Nat Genet* 46, 1283-1292.
37. Yang, Y., Muzny, D.M., Reid, J.G., Bainbridge, M.N., Willis, A., Ward, P.A., Braxton, A., Beuten, J., Xia, F., Niu, Z., et al. (2013). Clinical whole-exome sequencing for the diagnosis of mendelian disorders. *N Engl J Med* 369, 1502-1511.
38. Yang, Y., Muzny, D.M., Xia, F., Niu, Z., Person, R., Ding, Y., Ward, P., Braxton, A., Wang, M., Buhay, C., et al. (2014). Molecular findings among patients referred for clinical whole-exome sequencing. *JAMA* 312, 1870-1879.
39. Singh, G., and Cooper, T.A. (2006). Minigene reporter for identification and analysis of cis elements and trans factors affecting pre-mRNA splicing. *Biotechniques* 41, 177-181.
40. Bellelli, R., Castellone, M.D., Guida, T., Limongello, R., Dathan, N.A., Merolla, F., Cirafici, A.M., Affuso, A., Masai, H., Costanzo, V., et al. (2014). NCOA4 transcriptional coactivator inhibits activation of DNA replication origins. *Mol Cell* 55, 123-137.
